# Supplementary material for: Characterizing Spatial Patterns of Airborne Coarse Particulate (PM10–2.5) Mass and Chemical Components in Three Cities: The Multi-Ethnic Study of Atherosclerosis
Source: PubMed Central journal article supplement (PMC4123025; doi:10.1289/ehp.1307287), 2014-03-18
Supplement: ehp.1307287.s001.pdf [file ehp.1307287.s001.pdf]

## Supplemental Material

# Characterizing Spatial Patterns of Airborne Coarse Particulate (PM<sub>10-2.5</sub>) Mass and Chemical Components in Three Cities: The Multi-Ethnic Study of Atherosclerosis

Kai Zhang, Timothy V. Larson, Amanda Gasset, Adam A. Szpiro, Martha Daviglius, Gregory L. Burke, Joel D. Kaufman, and Sara D. Adar

| <u>Table of Contents</u>                                                                                                                                                                                                                                                                 | <u>Page</u> |
|------------------------------------------------------------------------------------------------------------------------------------------------------------------------------------------------------------------------------------------------------------------------------------------|-------------|
| <b>Table S1.</b> Detailed summary of statistics for PM <sub>10-2.5</sub> mass ( $\mu\text{g}/\text{m}^3$ and chemical component ( $\text{ng}/\text{m}^3$ ) concentrations at each sampling city by season                                                                                | 2           |
| <b>Table S2.</b> Land use regression model estimates for the difference in mean PM <sub>10-2.5</sub> mass ( $\mu\text{g}/\text{m}^3$ ) associated with a standard deviation difference in each predictor included in the final model for each city and for all three cities combined     | 4           |
| <b>Table S3.</b> Land use regression model estimates for the difference in mean PM <sub>10-2.5</sub> copper ( $\text{ng}/\text{m}^3$ ) associated with a standard deviation difference in each predictor included in the final model for each city and for all three cities combined     | 6           |
| <b>Table S4.</b> Land use regression model estimates for the difference in mean PM <sub>10-2.5</sub> phosphorus ( $\text{ng}/\text{m}^3$ ) associated with a standard deviation difference in each predictor included in the final model for each city and for all three cities combined | 8           |
| <b>Table S5.</b> Land use regression model estimates for the difference in mean PM <sub>10-2.5</sub> silicon ( $\mu\text{g}/\text{m}^3$ ) associated with a standard deviation difference in each predictor included in the final model for each city and for all three cities combined  | 10          |
| <b>Table S6.</b> Land use regression model estimates for the difference in mean PM <sub>10-2.5</sub> zinc ( $\text{ng}/\text{m}^3$ ) associated with a standard deviation difference in each predictor included in the final model for each city and for all three cities combined       | 12          |
| <b>Table S7.</b> Impacts of land use data sources on LUR model prediction performance for PM <sub>10-2.5</sub> mass concentrations                                                                                                                                                       | 14          |

**Table S1.** Detailed summary of statistics for PM<sub>10-2.5</sub> mass ( $\mu\text{g}/\text{m}^3$ ) and chemical component ( $\text{ng}/\text{m}^3$ ) concentrations at each sampling city by season.

| City and Season <sup>a</sup>   | Sample size | Mean  | SD <sup>b</sup> | Min   | P25 <sup>c</sup> | Median | P75 <sup>d</sup> | Max   |
|--------------------------------|-------------|-------|-----------------|-------|------------------|--------|------------------|-------|
| Chicago, IL - Total Mass       |             |       |                 |       |                  |        |                  |       |
| Winter                         | 33          | 5.54  | 1.98            | 1.95  | 4.43             | 5.32   | 6.27             | 10.69 |
| Summer                         | 31          | 5.94  | 2.09            | 2.84  | 4.51             | 5.40   | 7.86             | 11.73 |
| Overall                        | 64          | 5.73  | 2.03            | 1.95  | 4.48             | 5.36   | 6.87             | 11.73 |
| St. Paul, MN - Total Mass      |             |       |                 |       |                  |        |                  |       |
| Winter                         | 25          | 3.34  | 2.22            | -2.03 | 2.13             | 3.82   | 4.31             | 8.71  |
| Summer                         | 34          | 6.66  | 3.33            | -5.53 | 5.09             | 6.37   | 7.73             | 17.12 |
| Overall                        | 59          | 5.25  | 3.33            | -5.53 | 3.82             | 4.99   | 6.71             | 17.12 |
| Winston-Salem, NC - Total Mass |             |       |                 |       |                  |        |                  |       |
| Winter                         | 35          | 3.46  | 1.21            | 0.95  | 2.48             | 3.68   | 4.49             | 5.47  |
| Summer                         | 28          | 3.83  | 1.64            | 1.21  | 2.48             | 3.81   | 5.12             | 7.17  |
| Overall                        | 63          | 3.63  | 1.42            | 0.95  | 2.48             | 3.69   | 4.65             | 7.17  |
| Chicago, IL - Copper           |             |       |                 |       |                  |        |                  |       |
| Winter                         | 32          | 7.83  | 3.32            | 1.62  | 5.42             | 7.20   | 10.08            | 13.50 |
| Summer                         | 31          | 7.10  | 4.37            | -8.17 | 4.78             | 6.65   | 9.83             | 14.99 |
| Overall                        | 63          | 7.47  | 3.86            | -8.17 | 5.29             | 7.15   | 10.00            | 14.99 |
| St. Paul, MN - Copper          |             |       |                 |       |                  |        |                  |       |
| Winter                         | 25          | 4.01  | 1.23            | 2.42  | 3.38             | 3.64   | 4.49             | 7.89  |
| Summer                         | 34          | 2.77  | 1.69            | 0.59  | 1.84             | 2.43   | 2.97             | 9.10  |
| Overall                        | 59          | 3.29  | 1.63            | 0.59  | 2.17             | 2.97   | 3.81             | 9.10  |
| Winston-Salem, NC - Copper     |             |       |                 |       |                  |        |                  |       |
| Winter                         | 35          | 2.57  | 1.23            | 0.83  | 1.71             | 2.31   | 3.36             | 5.99  |
| Summer                         | 28          | 2.57  | 1.46            | -1.04 | 1.71             | 2.43   | 3.55             | 6.30  |
| Overall                        | 63          | 2.57  | 1.33            | -1.04 | 1.71             | 2.41   | 3.39             | 6.30  |
| Chicago, IL - Phosphorus       |             |       |                 |       |                  |        |                  |       |
| Winter                         | 32          | 13.64 | 6.00            | 2.11  | 10.54            | 12.72  | 15.93            | 32.98 |
| Summer                         | 31          | 17.87 | 3.87            | 11.26 | 15.33            | 16.95  | 20.16            | 26.57 |
| Overall                        | 63          | 15.72 | 5.46            | 2.11  | 12.20            | 15.48  | 18.75            | 32.98 |
| St. Paul, MN - Phosphorus      |             |       |                 |       |                  |        |                  |       |
| Winter                         | 25          | 8.20  | 4.68            | 1.50  | 4.30             | 7.65   | 10.79            | 19.58 |
| Summer                         | 34          | 18.67 | 5.44            | 8.48  | 14.53            | 17.65  | 23.11            | 32.18 |
| Overall                        | 59          | 14.23 | 7.29            | 1.50  | 8.86             | 14.33  | 19.10            | 32.18 |
| Winston-Salem, NC - Phosphorus |             |       |                 |       |                  |        |                  |       |
| Winter                         | 35          | 12.83 | 3.70            | 5.07  | 10.43            | 13.40  | 15.29            | 22.41 |
| Summer                         | 28          | 25.90 | 5.71            | 11.04 | 22.76            | 25.97  | 29.04            | 38.08 |
| Overall                        | 63          | 18.64 | 8.04            | 5.07  | 12.78            | 16.44  | 25.18            | 38.08 |

| City and Season <sup>a</sup> | Sample size | Mean   | SD <sup>b</sup> | Min    | P25 <sup>c</sup> | Median | P75 <sup>d</sup> | Max     |
|------------------------------|-------------|--------|-----------------|--------|------------------|--------|------------------|---------|
| Chicago, IL - Silicon        |             |        |                 |        |                  |        |                  |         |
| Winter                       | 32          | 428.24 | 105.37          | 217.53 | 357.74           | 430.10 | 501.98           | 633.57  |
| Summer                       | 31          | 306.84 | 157.92          | 92.32  | 205.19           | 263.37 | 408.88           | 793.36  |
| Overall                      | 63          | 368.51 | 146.16          | 92.32  | 259.38           | 360.55 | 463.32           | 793.36  |
| St. Paul, MN - Silicon       |             |        |                 |        |                  |        |                  |         |
| Winter                       | 25          | 266.04 | 41.13           | 208.77 | 238.16           | 262.64 | 280.74           | 402.17  |
| Summer                       | 34          | 719.31 | 188.23          | 524.37 | 602.30           | 675.99 | 796.22           | 1339.88 |
| Overall                      | 59          | 527.25 | 268.13          | 208.77 | 265.82           | 558.41 | 704.48           | 1339.88 |
| Winston-Salem, NC - Silicon  |             |        |                 |        |                  |        |                  |         |
| Winter                       | 35          | 410.63 | 85.93           | 285.46 | 354.55           | 382.39 | 461.41           | 748.54  |
| Summer                       | 28          | 345.90 | 109.79          | 172.76 | 287.69           | 330.06 | 382.41           | 661.99  |
| Overall                      | 63          | 381.86 | 101.74          | 172.76 | 323.22           | 370.12 | 433.24           | 748.54  |
| Chicago, IL - Zinc           |             |        |                 |        |                  |        |                  |         |
| Winter                       | 32          | 23.74  | 18.36           | 2.38   | 11.87            | 19.36  | 24.99            | 69.20   |
| Summer                       | 31          | 25.87  | 22.85           | -1.68  | 6.24             | 19.35  | 34.72            | 89.43   |
| Overall                      | 63          | 24.79  | 20.55           | -1.68  | 11.68            | 19.35  | 32.73            | 89.43   |
| St. Paul, MN - Zinc          |             |        |                 |        |                  |        |                  |         |
| Winter                       | 25          | 5.23   | 3.42            | -1.58  | 3.15             | 5.28   | 7.42             | 14.38   |
| Summer                       | 34          | 5.55   | 7.03            | -11.11 | 4.25             | 5.33   | 7.58             | 34.15   |
| Overall                      | 59          | 5.42   | 5.74            | -11.11 | 3.62             | 5.28   | 7.58             | 34.15   |
| Winston-Salem, NC - Zinc     |             |        |                 |        |                  |        |                  |         |
| Winter                       | 35          | 3.31   | 2.67            | -5.55  | 1.95             | 3.67   | 4.81             | 7.27    |
| Summer                       | 28          | 2.76   | 1.95            | -0.96  | 1.21             | 2.79   | 3.92             | 6.79    |
| Overall                      | 63          | 3.07   | 2.37            | -5.55  | 1.84             | 3.46   | 4.74             | 7.27    |

<sup>a</sup>All sampling was conducted in 2009. Chicago: winter April 8–22, summer August 20–September 3; St. Paul: winter January 17–31, summer May 27–June 10; Winston-Salem: winter February 25–March 11, summer July 6–20. <sup>b</sup>Standard deviation. <sup>c</sup>25<sup>th</sup> percentile. <sup>d</sup>75<sup>th</sup> percentile.

**Table S2.** Land use regression model estimates for the difference in mean PM<sub>10-2.5</sub> mass (µg/m<sup>3</sup>) associated with a standard deviation difference in each predictor included in the final model for each city and for all three cities combined.

| <b>Covariates</b>                                     | <b>Difference in predictor</b> | <b>Difference in PM<sub>10-2.5</sub> mass</b> |
|-------------------------------------------------------|--------------------------------|-----------------------------------------------|
| <b>Chicago, IL</b>                                    |                                |                                               |
| Length of A2 road within 5 km buffer                  | 1.29                           | -0.53 ± 0.22                                  |
| Residential area within 15 km buffer                  | 0.06                           | 0.32 ± 0.20                                   |
| Developed high intensity area within 0.75 km buffer   | 22.73                          | 0.92 ± 0.23                                   |
| Developed medium intensity area within 5 km buffer    | 10.33                          | 0.71 ± 0.25                                   |
| Residential area within 50 m buffer                   | 0.46                           | -0.10 ± 0.21                                  |
| Developed open space area within 3 km buffer          | 6.35                           | -0.28 ± 0.30                                  |
| Summer                                                | 0.50                           | -0.25 ± 0.26                                  |
| Summer × Residential area within 50 m buffer          | 0.42                           | -0.41 ± 0.26                                  |
| Summer × Developed open space area within 3 km buffer | 5.41                           | 0.69 ± 0.25                                   |
| <b>St. Paul, MN</b>                                   |                                |                                               |
| Length of A1 road within 0.4 km buffer                | 0.06                           | 1.10 ± 0.27                                   |
| Transition area within 10 km buffer                   | 0.002                          | -0.59 ± 0.28                                  |
| Open water area within 0.5 km buffer                  | 5.57                           | -0.80 ± 0.31                                  |
| Developed medium intensity area within 3 km buffer    | 7.80                           | 0.66 ± 0.32                                   |
| Evergreen forest within 0.3 km buffer                 | 1.60                           | 0.20 ± 0.36                                   |
| Non-forested wetland within 0.75 km buffer            | 1.08                           | -0.12 ± 0.41                                  |
| Summer                                                | 0.50                           | 1.28 ± 0.30                                   |
| Summer × Evergreen forest within 0.3 km buffer        | 1.08                           | 0.55 ± 0.35                                   |
| Summer × Non-forested wetland within 0.75 km buffer   | 0.85                           | 1.41 ± 0.41                                   |
| <b>Winston-Salem, NC</b>                              |                                |                                               |
| Length of A3 road within 0.5 km buffer                | 0.13                           | 0.41 ± 0.17                                   |
| Developed low intensity area within 0.1 km buffer     | 29.72                          | 0.38 ± 0.17                                   |
| Evergreen forest within 0.3 km buffer                 | 3.98                           | 0.39 ± 0.18                                   |
| Developed high intensity within 0.75 km buffer        | 4.22                           | 0.31 ± 0.16                                   |
| Shrub land area within 0.75 km buffer                 | 0.74                           | -0.09 ± 0.23                                  |
| Evergreen forest within 3 km buffer                   | 2.34                           | 0.18 ± 0.24                                   |
| Summer                                                | 0.50                           | -0.25 ± 0.24                                  |
| Summer × Shrub land area within 0.75 km buffer        | 0.63                           | -0.38 ± 0.25                                  |
| Summer × Evergreen forest within 3 km buffer          | 2.24                           | 0.88 ± 0.27                                   |

| <b>Covariates</b>                                 | <b>Difference in predictor</b> | <b>Difference in PM<sub>10-2.5</sub> mass</b> |
|---------------------------------------------------|--------------------------------|-----------------------------------------------|
| <b>All cities</b>                                 |                                |                                               |
| Distance to nearest large airport                 | 0.60                           | -0.55 ± 0.20                                  |
| Population density within 5 km buffer             | 1.12                           | 0.91 ± 0.21                                   |
| Log scale of distance to nearest railroad         | 1.20                           | -0.44 ± 0.15                                  |
| Distance to nearest airport                       | 0.48                           | -0.25 ± 0.21                                  |
| Length of A1 road within 0.5 km buffer            | 0.09                           | 0.27 ± 0.17                                   |
| Log scale of distance to nearest A3 road          | 1.60                           | 0.01 ± 0.17                                   |
| Summer                                            | 0.50                           | 0.66 ± 0.46                                   |
| St. Paul                                          | 0.47                           | -0.56 ± 0.22                                  |
| Summer × Distance nearest to airport              | 0.51                           | -1.41 ± 0.28                                  |
| Summer × Log scale of distance to nearest A3 road | 2.69                           | 1.00 ± 0.46                                   |
| St. Paul × Length of A1 road within 0.5 km buffer | 0.06                           | 0.62 ± 0.18                                   |

**Table S3.** Land use regression model estimates for the difference in mean PM<sub>10-2.5</sub> copper (ng/m<sup>3</sup>) associated with a standard deviation difference in each predictor included in the final model for each city and for all three cities combined.

| <b>Covariates</b>                                     | <b>Difference in predictor</b> | <b>Difference in PM<sub>10-2.5</sub> copper</b> |
|-------------------------------------------------------|--------------------------------|-------------------------------------------------|
| <b>Chicago, IL</b>                                    |                                |                                                 |
| Log scale of distance to nearest A1 road              | 1.19                           | -1.14 ± 0.45                                    |
| Length of A2 road within 0.4 km buffer                | 0.04                           | 0.38 ± 0.40                                     |
| CALINE long term average within 4.5 km buffer         | 4.34                           | 0.38 ± 0.47                                     |
| Developed high intensity within 0.3 km buffer         | 23.66                          | 1.37 ± 0.41                                     |
| Developed medium intensity within 5 km buffer         | 10.40                          | 1.28 ± 0.34                                     |
| Barren area within 1 km buffer                        | 0.55                           | -0.55 ± 0.32                                    |
| Summer                                                | 0.50                           | -1.04 ± 0.32                                    |
| Summer × Length of A2 road within 0.4 km buffer       | 0.03                           | 0.58 ± 0.40                                     |
| <b>St. Paul, MN</b>                                   |                                |                                                 |
| Length of A1 road within 0.75 km buffer               | 0.16                           | 0.46 ± 0.09                                     |
| Length of A3 road within 5 km buffer                  | 2.79                           | 0.19 ± 0.09                                     |
| Residential area within 50 m buffer                   | 0.48                           | 0.34 ± 0.08                                     |
| Developed high intensity within 0.3 km buffer         | 14.43                          | 0.72 ± 0.11                                     |
| Developed open space area within 3 km buffer          | 6.29                           | 0.14 ± 0.12                                     |
| Summer                                                | 0.50                           | -0.41 ± 0.18                                    |
| Summer × Nonforested wetland within 0.75 km buffer    | 0.85                           | 0.81 ± 0.12                                     |
| Summer × Developed open space area within 3 km buffer | 8.11                           | -0.52 ± 0.20                                    |
| <b>Winston-Salem, NC</b>                              |                                |                                                 |
| Length of A3 road within 0.75 km buffer               | 0.21                           | 0.45 ± 0.15                                     |
| Log scale of distance to nearest A3 road              | 1.70                           | -0.17 ± 0.14                                    |
| Commercial area within 0.5 km buffer                  | 0.14                           | 0.01 ± 0.16                                     |
| Herbaceous rangeland within 0.5 km buffer             | 3.32                           | -0.31 ± 0.14                                    |
| Shrub rangeland within 1 km buffer                    | 0.69                           | -0.3 ± 0.13                                     |
| Summer                                                | 0.50                           | -0.13 ± 0.15                                    |
| Summer × Length of A2 road within 0.5 km buffer       | 0.02                           | 0.45 ± 0.16                                     |
| Summer × Commercial area within 0.5 km buffer         | 0.10                           | 0.41 ± 0.17                                     |
| <b>All cities</b>                                     |                                |                                                 |
| Population density within 10 km buffer                | 3.85                           | 1.65 ± 0.22                                     |
| Length of A1 road within 0.5 km buffer                | 0.09                           | 0.47 ± 0.22                                     |
| CALINE long term average within 3 km buffer           | 3.87                           | 0.52 ± 0.22                                     |
| Emissions of coarse particles within 30 km buffer     | 1.08                           | 0.89 ± 0.24                                     |
| Distance to nearest airport                           | 0.48                           | -0.31 ± 0.2                                     |
| Log scale of distance to nearest railroad             | 1.20                           | -0.22 ± 0.17                                    |
| Summer                                                | 0.50                           | 0.05 ± 0.25                                     |

| <b>Covariates</b>                                    | <b>Difference in predictor</b> | <b>Difference in PM<sub>10-2.5</sub> copper</b> |
|------------------------------------------------------|--------------------------------|-------------------------------------------------|
| St. Paul                                             | 0.47                           | 0.05 ± 0.8                                      |
| Summer × Distance to nearest airport                 | 0.51                           | -0.70 ± 0.27                                    |
| St. Paul × Log scale of distance to nearest railroad | 3.28                           | -1.32 ± 0.82                                    |

**Table S4.** Land use regression model estimates for the difference in mean PM<sub>10-2.5</sub> phosphorus (ng/m<sup>3</sup>) associated with a standard deviation difference in each predictor included in the final model for each city and for all three cities combined.

| <b>Covariates</b>                                     | <b>Difference in predictor</b> | <b>Difference in PM<sub>10-2.5</sub> phosphorus</b> |
|-------------------------------------------------------|--------------------------------|-----------------------------------------------------|
| <b>Chicago, IL</b>                                    |                                |                                                     |
| Distance to nearest large port                        | 0.74                           | -4.6 ± 0.95                                         |
| Industrial area within 0.75 km buffer                 | 0.16                           | -0.82 ± 1.12                                        |
| Transition area within 15 km buffer                   | 0.01                           | 0.28 ± 0.72                                         |
| Developed medium intensity within 150 m buffer        | 24.01                          | -2.39 ± 0.60                                        |
| Developed medium intensity within 5 km buffer         | 10.40                          | 1.09 ± 0.66                                         |
| Water area within 1 km buffer                         | 10.16                          | -1.42 ± 0.61                                        |
| Summer                                                | 0.50                           | -2.54 ± 1.26                                        |
| Summer × Distance to nearest large port               | 0.83                           | 3.54 ± 1.50                                         |
| Summer × Industrial area within 0.75 km buffer        | 0.15                           | 2.04 ± 1.16                                         |
| Summer × Transition area within 15 km buffer          | 0.01                           | 0.54 ± 0.92                                         |
| <b>St. Paul, MN</b>                                   |                                |                                                     |
| Log scale of distance to nearest A1 road              | 1.06                           | 0.45 ± 0.87                                         |
| Mine area within 5 km buffer                          | 0.002                          | -1.39 ± 0.60                                        |
| Developed high intensity within 0.3 km buffer         | 14.43                          | 1.82 ± 0.62                                         |
| Forest land within 50 m buffer                        | 16.08                          | 0.8 ± 0.59                                          |
| Pasture land within 0.75 km buffer                    | 2.17                           | 1.18 ± 0.83                                         |
| Nonforested wetland within 0.75 km buffer             | 1.08                           | -0.1 ± 0.87                                         |
| Summer                                                | 0.50                           | 0.02 ± 3.50                                         |
| Summer × Log scale of distance to nearest A1 road     | 3.34                           | 4.82 ± 3.46                                         |
| Summer × Pasture land within 0.75 km buffer           | 1.67                           | 0.57 ± 0.84                                         |
| Summer × Nonforested wetland within 0.75 km buffer    | 0.85                           | 2.1 ± 0.86                                          |
| <b>Winston-Salem, NC</b>                              |                                |                                                     |
| Length of A1 road within 0.75 km buffer               | 0.11                           | 1.74 ± 0.74                                         |
| Length of A3 road within 0.75 km buffer               | 0.21                           | 1.71 ± 0.62                                         |
| Log scale of distance to nearest truck route          | 0.96                           | 0.85 ± 0.81                                         |
| Commercial area within 105 m buffer                   | 0.20                           | 0.37 ± 0.65                                         |
| Mixed forest land within 0.75 km buffer               | 0.53                           | 0.89 ± 0.63                                         |
| Summer                                                | 0.50                           | -4.53 ± 3.68                                        |
| Summer × Commercial area within 105 m buffer          | 0.14                           | 0.41 ± 0.69                                         |
| Summer × Mixed forest land within 0.75 km buffer      | 0.35                           | 1.17 ± 0.66                                         |
| Summer × Log scale of distance to nearest truck route | 3.63                           | 11.04 ± 3.72                                        |



| <b>Covariates</b>                                     | <b>Difference in predictor</b> | <b>Difference in PM<sub>10-2.5</sub> phosphorus</b> |
|-------------------------------------------------------|--------------------------------|-----------------------------------------------------|
| <b>All cities</b>                                     |                                |                                                     |
| Length of A3 road within 1.5 km buffer                | 0.70                           | 1.43 ± 0.43                                         |
| Length of A2 road within 5.0 km buffer                | 1.07                           | -1.17 ± 0.4                                         |
| 75th percentile NDVI within 10 km buffer              | 37.89                          | -0.22 ± 0.56                                        |
| Summer                                                | 0.50                           | -4.52 ± 1.53                                        |
| Log scale of distance to nearest rail road            | 1.20                           | -0.24 ± 0.48                                        |
| St. Paul                                              | 0.47                           | 4.45 ± 2.28                                         |
| Summer × 75th percentile NDVI within 10 km buffer     | 84.18                          | 9.51 ± 1.56                                         |
| St. Paul × Log scale of distance to nearest rail road | 3.28                           | -6.39 ± 2.28                                        |

**Table S5.** Land use regression model estimates for the difference in mean PM<sub>10-2.5</sub> silicon ( $\mu\text{g}/\text{m}^3$ ) associated with a standard deviation difference in each predictor included in the final model for each city and for all three cities combined.

| <b>Covariates</b>                                      | <b>Difference in predictor</b> | <b>Difference in PM<sub>10-2.5</sub> silicon</b> |
|--------------------------------------------------------|--------------------------------|--------------------------------------------------|
| <b>Chicago, IL</b>                                     |                                |                                                  |
| Residential area within 50 m buffer                    | 0.30                           | -0.05 ± 0.01                                     |
| Residential area within 15km buffer                    | 0.06                           | 0.06 ± 0.02                                      |
| Other urban are within 15 km buffer                    | 0.01                           | -0.02 ± 0.02                                     |
| Developed high intensity within 0.3 km buffer          | 23.66                          | 0.04 ± 0.01                                      |
| Developed open space area within 0.4 km buffer         | 8.51                           | -0.03 ± 0.02                                     |
| Water area within 0.75 km buffer                       | 7.65                           | -0.01 ± 0.02                                     |
| Summer                                                 | 0.50                           | 0.05 ± 0.05                                      |
| Summer × Other urban are within 15 km buffer           | 0.02                           | -0.13 ± 0.05                                     |
| Summer × Water area within 0.75 km buffer              | 5.34                           | -0.03 ± 0.02                                     |
| <b>St. Paul, MN</b>                                    |                                |                                                  |
| Developed high intensity within 0.4 km buffer          | 13.60                          | 0.02 ± 0.01                                      |
| Other urban are within 0.5 km buffer                   | 0.09                           | 0.002 ± 0.01                                     |
| Evergreen forest land within 3 km buffer               | 0.50                           | -0.02 ± 0.01                                     |
| Shrub rangeland within 0.5 km buffer                   | 0.88                           | 0.02 ± 0.01                                      |
| Nonforested wetland within 0.75 km buffer              | 1.08                           | -0.004 ± 0.01                                    |
| Summer                                                 | 0.50                           | 0.19 ± 0.01                                      |
| Summer × Developed high intensity within 0.4 km buffer | 11.46                          | 0.04 ± 0.01                                      |
| Summer × Other urban are within 0.5 km buffer          | 0.06                           | -0.04 ± 0.01                                     |
| Summer × Shrub rangeland within 0.5 km buffer          | 0.71                           | 0.02 ± 0.01                                      |
| Summer × Nonforested wetland within 0.75 km buffer     | 0.85                           | 0.10 ± 0.01                                      |
| <b>Winston-Salem, NC</b>                               |                                |                                                  |
| Length of A3 road within 0.5 km buffer                 | 0.13                           | 0.03 ± 0.01                                      |
| Industrial area within 1.5 km buffer                   | 0.04                           | 0.001 ± 0.01                                     |
| Open water area within 0.75 km buffer                  | 0.53                           | -0.02 ± 0.01                                     |
| Evergreen forest within 0.3 km buffer                  | 3.98                           | 0.03 ± 0.01                                      |
| Pasture land within 0.3 km buffer                      | 9.24                           | -0.02 ± 0.01                                     |
| Shrubland area within 0.75 km buffer                   | 0.74                           | -0.02 ± 0.01                                     |
| Summer                                                 | 0.50                           | -0.05 ± 0.01                                     |
| Summer × Industrial area within 1.5 km buffer          | 0.03                           | 0.04 ± 0.01                                      |
| Summer × Pasture land within 0.3 km buffer             | 6.46                           | 0.05 ± 0.01                                      |
| Summer × Shrubland area within 0.75 km buffer          | 0.63                           | -0.01 ± 0.02                                     |

| <b>Covariates</b>                                         | <b>Difference in predictor</b> | <b>Difference in PM<sub>10-2.5</sub> silicon</b> |
|-----------------------------------------------------------|--------------------------------|--------------------------------------------------|
| <b>All cities</b>                                         |                                |                                                  |
| Length of A3 road within 50 m buffer                      | 0.00                           | -0.02 ± 0.01                                     |
| Log scale of distance to nearest rail road                | 1.20                           | -0.04 ± 0.01                                     |
| Distance to nearest airport                               | 0.48                           | 0.02 ± 0.02                                      |
| Length of A1 road within 3 km buffer                      | 0.98                           | 0.02 ± 0.01                                      |
| CALINE long term average within 9 km buffer               | 4.02                           | -0.02 ± 0.02                                     |
| Emissions of coarse particles within 3 km buffer          | 0.01                           | -0.05 ± 0.02                                     |
| Summer                                                    | 0.50                           | 0.11 ± 0.03                                      |
| St. Paul                                                  | 0.47                           | 0.02 ± 0.02                                      |
| Summer × Distance to nearest airport                      | 0.51                           | -0.14 ± 0.02                                     |
| Summer × CALINE long term average within 9 km buffer      | 3.73                           | 0.03 ± 0.02                                      |
| Summer × Emissions of coarse particles within 3 km buffer | 0.01                           | 0.07 ± 0.02                                      |
| St. Paul × Length of A1 road within 3 km buffer           | 0.88                           | 0.04 ± 0.02                                      |

**Table S6.** Land use regression model estimates for the difference in mean PM<sub>10-2.5</sub> zinc (ng/m<sup>3</sup>) associated with a standard deviation difference in each predictor included in the final model for each city and for all three cities combined.

| <b>Covariates</b>                                      | <b>Difference in predictor</b> | <b>Difference in PM<sub>10-2.5</sub> zinc</b> |
|--------------------------------------------------------|--------------------------------|-----------------------------------------------|
| <b>Chicago, IL</b>                                     |                                |                                               |
| Length of A1 road within 0.5 km buffer                 | 1.16                           | 11.2 ± 1.92                                   |
| Length of A2 road within 3 km buffer                   | 0.62                           | -2.89 ± 1.60                                  |
| Industrial area within 1km buffer                      | 0.16                           | 10.41 ± 1.59                                  |
| Developed open space area within 3 km buffer           | 6.39                           | -3.21 ± 1.76                                  |
| Developed high intensity within 0.3 km buffer          | 23.66                          | -0.13 ± 2.39                                  |
| Forest land within 0.4 km buffer                       | 4.04                           | 2.41 ± 1.41                                   |
| Summer                                                 | 0.50                           | -2.05 ± 1.87                                  |
| Summer × Developed high intensity within 0.3 km buffer | 21.27                          | -4.09 ± 2.33                                  |
| <b>St. Paul, MN</b>                                    |                                |                                               |
| Distance to nearest A2 road                            | 0.12                           | -1.46 ± 0.55                                  |
| Transport are within 0.5 km buffer                     | 0.06                           | 0.68 ± 0.61                                   |
| Commercial area within 0.75 km buffer                  | 0.19                           | 1.02 ± 0.64                                   |
| Transition area within 1.5 km buffer                   | 0.03                           | 0.03 ± 0.74                                   |
| Shrub rangeland within 3 km buffer                     | 0.68                           | 1.41 ± 0.55                                   |
| Evergreen forest within 0.4 km buffer                  | 1.16                           | 0.14 ± 0.74                                   |
| Summer                                                 | 0.50                           | 0.12 ± 0.58                                   |
| Summer × Transition area within 1.5 km buffer          | 0.02                           | 3.42 ± 0.71                                   |
| Summer × Evergreen forest within 0.4 km buffer         | 0.84                           | -1.53 ± 0.72                                  |
| <b>Winston-Salem, NC</b>                               |                                |                                               |
| Transport are within 1 km buffer                       | 0.05                           | 0.67 ± 0.26                                   |
| Residential area within 50 m buffer                    | 0.47                           | 0.34 ± 0.31                                   |
| Other urban are within 0.75 km buffer                  | 0.05                           | -0.84 ± 0.24                                  |
| Mixed forest land within 5 km buffer                   | 0.45                           | -0.57 ± 0.25                                  |
| Shrub rangeland within 1 km buffer                     | 0.69                           | -0.53 ± 0.27                                  |
| Open water area within 5 km buffer                     | 0.72                           | -0.04 ± 0.38                                  |
| Summer                                                 | 0.50                           | 0.38 ± 0.41                                   |
| Summer × Residential area within 50 m buffer           | 0.42                           | -1.21 ± 0.41                                  |
| Summer × Open water area within 5 km buffer            | 0.63                           | 0.82 ± 0.41                                   |
| <b>All cities</b>                                      |                                |                                               |
| Population density within 10 km buffer                 | 3.85                           | 13.50 ± 1.33                                  |
| Length of A2 road within 5 km buffer                   | 1.07                           | -3.16 ± 0.78                                  |
| Log scale of distance to nearest truck route           | 1.09                           | -2.15 ± 0.75                                  |
| Distance to nearest airport                            | 0.48                           | -2.36 ± 1.16                                  |
| Length of A3 road within 0.5 km buffer                 | 0.12                           | -0.74 ± 1.01                                  |

| <b>Covariates</b>                               | <b>Difference in predictor</b> | <b>Difference in PM<sub>10-2.5</sub> zinc</b> |
|-------------------------------------------------|--------------------------------|-----------------------------------------------|
| Length of A3 road within 5 km buffer            | 5.80                           | -0.25 ± 1.42                                  |
| Summer                                          | 0.50                           | 1.91 ± 1.62                                   |
| St. Paul                                        | 0.47                           | 1.62 ± 2.84                                   |
| Summer × Distance to nearest airport            | 0.51                           | -2.07 ± 1.41                                  |
| Summer × Length of A3 road within 0.5 km buffer | 0.11                           | -1.90 ± 1.22                                  |
| St. Paul × Length of A3 road within 5 km buffer | 6.34                           | -4.20 ± 2.81                                  |

**Table S7.** Impacts of land use data sources on LUR model prediction performance for PM<sub>10-2.5</sub> mass concentrations.

| <b>City</b>       | <b>CV Measure</b> | <b>2000 + Supplemental<br/>1970s/1980s</b> | <b>2000</b> | <b>1970s/1980s</b> |
|-------------------|-------------------|--------------------------------------------|-------------|--------------------|
| Chicago, IL       | R <sup>2</sup>    | 0.68                                       | 0.68        | 0.64               |
| Chicago, IL       | RMSE              | 1.16                                       | 1.16        | 1.22               |
| St. Paul, MN      | R <sup>2</sup>    | 0.51                                       | 0.49        | 0.39               |
| St. Paul, MN      | RMSE              | 2.33                                       | 2.37        | 2.60               |
| Winston-Salem, NC | R <sup>2</sup>    | 0.41                                       | 0.41        | 0.36               |
| Winston-Salem, NC | RMSE              | 1.09                                       | 1.09        | 1.14               |
